# Supplementary material for: Subcritical Fluid Chromatography at Sub-Ambient Temperatures for the Chiral Resolution of Ketamine Metabolites with Rapid-Onset Antidepressant Effects
Source: MDPI journal article supplement (doi:10.3390/molecules24101927), 2019-05-19
Supplement: s1 [file s1]

## Sample Information

Data File : Amy-2\_IPA.lcd

## Method

## &lt;&lt;Pump&gt;&gt;

Mode : Binary gradient  
 Total Flow : 3.0000 mL/min  
 Pump C Flow : 0.1000 mL/min  
 B Conc. : 8.0 %  
 B Curve : 0  
 PressMax : 350 bar  
 PressMin : 0 bar  
 Pump C PressMax : 350 bar  
 Pump C PressMin : 0 bar  
 Solenoid Valve B Name : LPGE Unit  
 Solenoid Valve B : A  
 Compressibility Setting : Off  
 Pump A Shut Off Valve : Open

## &lt;&lt;Autosampler&gt;&gt;

Autosampler Model : SIL-30AC  
 Enable Autosampler : Use  
 Rinse Type : External only  
 Sample Rack : Rack 1.5 mL 105 vials  
 Rinsing Volume : 500 uL  
 Needle Stroke : 52 mm  
 Control Vial Needle Stroke : 52 mm  
 Rinsing Speed : 35 uL/sec  
 Sampling Speed : 5.0 uL/sec  
 Sample Discharge Speed : 1.0 uL/sec  
 Measuring Line Purge Time : 10.0 min  
 Rinse Port R0 Purge Time : 10.0 min  
 Rinse Mode : Before and after aspiration  
 Rinse Dip Time : 0 sec  
 Cooler Temperature : 7 C  
 Measuring Line Purge Volume : 100 uL  
 Air Gap Volume : 0.1 uL  
 Loop Injection Type : Partial Loop  
 Rinse Method : Rinse port only  
 Rinse Time : 2 sec

## &lt;&lt;Oven&gt;&gt;

Oven Model : CTO-20AC  
 Enable Oven : Use  
 Oven Temperature : 15 C  
 Maximum Temperature : 90 C  
 Ready Check : On

## &lt;&lt;LC Time Program&gt;&gt;

| Time  | Module     | Command      | Value | Comment |
|-------|------------|--------------|-------|---------|
| 3.00  | Pumps      | Pump B Conc. | 8     |         |
| 3.25  | Pumps      | Pump B Conc. | 25    |         |
| 17.50 | Pumps      | Pump B Conc. | 25    |         |
| 18.00 | Pumps      | Pump B Conc. | 8     |         |
| 20.00 | Controller | Stop         |       |         |

## &lt;&lt;SFC A&gt;&gt;

SFC : SFC-30A  
 BPR Pressure : 100.0 bar  
 BPR Temperature : 50 C

## &lt;&lt;SFC B&gt;&gt;

SFC : SFC-30A  
 BPR Pressure : 400.0 bar  
 BPR Temperature : 50 C

## &lt;&lt;Sample Pretreatment&gt;&gt;

Mode : Standard

Data File : Amy-2\_MeOH.lcd

## Sample Information

## Method

## &lt;&lt;Pump&gt;&gt;

Mode : Binary gradient  
 Total Flow : 3.0000 mL/min  
 Pump C Flow : 0.1000 mL/min  
 B Conc. : 8.0 %  
 B Curve : 0  
 PressMax : 350 bar  
 PressMin : 0 bar  
 Pump C PressMax : 350 bar  
 Pump C PressMin : 0 bar  
 Solenoid Valve B Name : LPGE Unit  
 Solenoid Valve B : A  
 Compressibility Setting : Off  
 Pump A Shut Off Valve : Open

## &lt;&lt;Autosampler&gt;&gt;

Autosampler Model : SIL-30AC  
 Enable Autosampler : Use  
 Rinse Type : External only  
 Sample Rack : Rack 1.5 mL 105 vials  
 Rinsing Volume : 500 uL  
 Needle Stroke : 52 mm  
 Control Vial Needle Stroke : 52 mm  
 Rinsing Speed : 35 uL/sec  
 Sampling Speed : 5.0 uL/sec  
 Sample Discharge Speed : 1.0 uL/sec  
 Measuring Line Purge Time : 10.0 min  
 Rinse Port R0 Purge Time : 10.0 min  
 Rinse Mode : Before and after aspiration  
 Rinse Dip Time : 0 sec  
 Cooler Temperature : 7 C  
 Measuring Line Purge Volume : 100 uL  
 Air Gap Volume : 0.1 uL  
 Loop Injection Type : Partial Loop  
 Rinse Method : Rinse port only  
 Rinse Time : 2 sec

## &lt;&lt;Oven&gt;&gt;

Oven Model : CTO-20AC  
 Enable Oven : Use  
 Oven Temperature : 15 C  
 Maximum Temperature : 90 C  
 Ready Check : On

## &lt;&lt;LC Time Program&gt;&gt;

| Time  | Module     | Command      | Value | Comment |
|-------|------------|--------------|-------|---------|
| 3.00  | Pumps      | Pump B Conc. | 8     |         |
| 3.25  | Pumps      | Pump B Conc. | 25    |         |
| 17.50 | Pumps      | Pump B Conc. | 25    |         |
| 18.00 | Pumps      | Pump B Conc. | 8     |         |
| 20.00 | Controller | Stop         |       |         |

## &lt;&lt;SFC A&gt;&gt;

SFC : SFC-30A  
 BPR Pressure : 100.0 bar  
 BPR Temperature : 50 C

## &lt;&lt;SFC B&gt;&gt;

SFC : SFC-30A  
 BPR Pressure : 400.0 bar  
 BPR Temperature : 50 C

## &lt;&lt;Sample Pretreatment&gt;&gt;

Mode : Standard

Data File : Amy-3\_IPA.lcd Sample Information

## Method

## &lt;&lt;Pump&gt;&gt;

Mode : Binary gradient  
 Total Flow : 1.5000 mL/min  
 Pump C Flow : 0.1000 mL/min  
 B Conc. : 8.0 %  
 B Curve : 0  
 PressMax : 350 bar  
 PressMin : 0 bar  
 Pump C PressMax : 350 bar  
 Pump C PressMin : 0 bar  
 Solenoid Valve B Name : LPGE Unit  
 Solenoid Valve B : A  
 Compressibility Setting : Off  
 Pump A Shut Off Valve : Open

## &lt;&lt;Autosampler&gt;&gt;

Autosampler Model : SIL-30AC  
 Enable Autosampler : Use  
 Rinse Type : External only  
 Sample Rack : Rack 1.5 mL 105 vials  
 Rinsing Volume : 500 uL  
 Needle Stroke : 52 mm  
 Control Vial Needle Stroke : 52 mm  
 Rinsing Speed : 35 uL/sec  
 Sampling Speed : 5.0 uL/sec  
 Sample Discharge Speed : 1.0 uL/sec  
 Measuring Line Purge Time : 10.0 min  
 Rinse Port R0 Purge Time : 10.0 min  
 Rinse Mode : Before and after aspiration  
 Rinse Dip Time : 0 sec  
 Cooler Temperature : 7 C  
 Measuring Line Purge Volume : 100 uL  
 Air Gap Volume : 0.1 uL  
 Loop Injection Type : Partial Loop  
 Rinse Method : Rinse port only  
 Rinse Time : 2 sec

## &lt;&lt;Oven&gt;&gt;

Oven Model : CTO-20AC  
 Enable Oven : Use  
 Oven Temperature : 15 C  
 Maximum Temperature : 90 C  
 Ready Check : On

## &lt;&lt;LC Time Program&gt;&gt;

| Time  | Module     | Command      | Value | Comment |
|-------|------------|--------------|-------|---------|
| 3.00  | Pumps      | Pump B Conc. | 8     |         |
| 3.25  | Pumps      | Pump B Conc. | 25    |         |
| 17.50 | Pumps      | Pump B Conc. | 25    |         |
| 18.00 | Pumps      | Pump B Conc. | 8     |         |
| 20.00 | Controller | Stop         |       |         |

## &lt;&lt;SFC A&gt;&gt;

SFC : SFC-30A  
 BPR Pressure : 100.0 bar  
 BPR Temperature : 50 C

## &lt;&lt;SFC B&gt;&gt;

SFC : SFC-30A  
 BPR Pressure : 400.0 bar  
 BPR Temperature : 50 C

## &lt;&lt;Sample Pretreatment&gt;&gt;

Mode : Standard

Data File : Amy-3\_MeOH.lcd

## Sample Information

## Method

## &lt;&lt;Pump&gt;&gt;

Mode : Binary gradient  
 Total Flow : 1.5000 mL/min  
 Pump C Flow : 0.1000 mL/min  
 B Conc. : 8.0 %  
 B Curve : 0  
 PressMax : 350 bar  
 PressMin : 0 bar  
 Pump C PressMax : 350 bar  
 Pump C PressMin : 0 bar  
 Solenoid Valve B Name : LPGE Unit  
 Solenoid Valve B : A  
 Compressibility Setting : Off  
 Pump A Shut Off Valve : Open

## &lt;&lt;Autosampler&gt;&gt;

Autosampler Model : SIL-30AC  
 Enable Autosampler : Use  
 Rinse Type : External only  
 Sample Rack : Rack 1.5 mL 105 vials  
 Rinsing Volume : 500 uL  
 Needle Stroke : 52 mm  
 Control Vial Needle Stroke : 52 mm  
 Rinsing Speed : 35 uL/sec  
 Sampling Speed : 5.0 uL/sec  
 Sample Discharge Speed : 1.0 uL/sec  
 Measuring Line Purge Time : 10.0 min  
 Rinse Port R0 Purge Time : 10.0 min  
 Rinse Mode : Before and after aspiration  
 Rinse Dip Time : 0 sec  
 Cooler Temperature : 7 C  
 Measuring Line Purge Volume : 100 uL  
 Air Gap Volume : 0.1 uL  
 Loop Injection Type : Partial Loop  
 Rinse Method : Rinse port only  
 Rinse Time : 2 sec

## &lt;&lt;Oven&gt;&gt;

Oven Model : CTO-20AC  
 Enable Oven : Use  
 Oven Temperature : 15 C  
 Maximum Temperature : 90 C  
 Ready Check : On

## &lt;&lt;LC Time Program&gt;&gt;

| Time  | Module     | Command      | Value | Comment |
|-------|------------|--------------|-------|---------|
| 3.00  | Pumps      | Pump B Conc. | 8     |         |
| 3.25  | Pumps      | Pump B Conc. | 25    |         |
| 17.50 | Pumps      | Pump B Conc. | 25    |         |
| 18.00 | Pumps      | Pump B Conc. | 8     |         |
| 20.00 | Controller | Stop         |       |         |

## &lt;&lt;SFC A&gt;&gt;

SFC : SFC-30A  
 BPR Pressure : 100.0 bar  
 BPR Temperature : 50 C

## &lt;&lt;SFC B&gt;&gt;

SFC : SFC-30A  
 BPR Pressure : 400.0 bar  
 BPR Temperature : 50 C

## &lt;&lt;Sample Pretreatment&gt;&gt;

Mode : Standard

Data File : Cellu-5\_IPA.lcd

## Sample Information

## Method

## &lt;&lt;Pump&gt;&gt;

Mode : Binary gradient  
 Total Flow : 1.5000 mL/min  
 Pump C Flow : 0.1000 mL/min  
 B Conc. : 8.0 %  
 B Curve : 0  
 PressMax : 350 bar  
 PressMin : 0 bar  
 Pump C PressMax : 350 bar  
 Pump C PressMin : 0 bar  
 Solenoid Valve B Name : LPGE Unit  
 Solenoid Valve B : A  
 Compressibility Setting : Off  
 Pump A Shut Off Valve : Open

## &lt;&lt;Autosampler&gt;&gt;

Autosampler Model : SIL-30AC  
 Enable Autosampler : Use  
 Rinse Type : External only  
 Sample Rack : Rack 1.5 mL 105 vials  
 Rinsing Volume : 500 uL  
 Needle Stroke : 52 mm  
 Control Vial Needle Stroke : 52 mm  
 Rinsing Speed : 35 uL/sec  
 Sampling Speed : 5.0 uL/sec  
 Sample Discharge Speed : 1.0 uL/sec  
 Measuring Line Purge Time : 10.0 min  
 Rinse Port R0 Purge Time : 10.0 min  
 Rinse Mode : Before and after aspiration  
 Rinse Dip Time : 0 sec  
 Cooler Temperature : 7 C  
 Measuring Line Purge Volume : 100 uL  
 Air Gap Volume : 0.1 uL  
 Loop Injection Type : Partial Loop  
 Rinse Method : Rinse port only  
 Rinse Time : 2 sec

## &lt;&lt;Oven&gt;&gt;

Oven Model : CTO-20AC  
 Enable Oven : Use  
 Oven Temperature : 15 C  
 Maximum Temperature : 90 C  
 Ready Check : On

## &lt;&lt;LC Time Program&gt;&gt;

| Time  | Module     | Command      | Value | Comment |
|-------|------------|--------------|-------|---------|
| 3.00  | Pumps      | Pump B Conc. | 8     |         |
| 3.25  | Pumps      | Pump B Conc. | 25    |         |
| 17.50 | Pumps      | Pump B Conc. | 25    |         |
| 18.00 | Pumps      | Pump B Conc. | 8     |         |
| 20.00 | Controller | Stop         |       |         |

## &lt;&lt;SFC A&gt;&gt;

SFC : SFC-30A  
 BPR Pressure : 100.0 bar  
 BPR Temperature : 50 C

## &lt;&lt;SFC B&gt;&gt;

SFC : SFC-30A  
 BPR Pressure : 400.0 bar  
 BPR Temperature : 50 C

## &lt;&lt;Sample Pretreatment&gt;&gt;

Mode : Standard

Data File : Cellu-5\_MeOH.lcd

## Sample Information

## Method

## &lt;&lt;Pump&gt;&gt;

Mode : Binary gradient  
 Total Flow : 1.5000 mL/min  
 Pump C Flow : 0.1000 mL/min  
 B Conc. : 8.0 %  
 B Curve : 0  
 PressMax : 350 bar  
 PressMin : 0 bar  
 Pump C PressMax : 350 bar  
 Pump C PressMin : 0 bar  
 Solenoid Valve B Name : LPGE Unit  
 Solenoid Valve B : A  
 Compressibility Setting : Off  
 Pump A Shut Off Valve : Open

## &lt;&lt;Autosampler&gt;&gt;

Autosampler Model : SIL-30AC  
 Enable Autosampler : Use  
 Rinse Type : External only  
 Sample Rack : Rack 1.5 mL 105 vials  
 Rinsing Volume : 500 uL  
 Needle Stroke : 52 mm  
 Control Vial Needle Stroke : 52 mm  
 Rinsing Speed : 35 uL/sec  
 Sampling Speed : 5.0 uL/sec  
 Sample Discharge Speed : 1.0 uL/sec  
 Measuring Line Purge Time : 10.0 min  
 Rinse Port R0 Purge Time : 10.0 min  
 Rinse Mode : Before and after aspiration  
 Rinse Dip Time : 0 sec  
 Cooler Temperature : 7 C  
 Measuring Line Purge Volume : 100 uL  
 Air Gap Volume : 0.1 uL  
 Loop Injection Type : Partial Loop  
 Rinse Method : Rinse port only  
 Rinse Time : 2 sec

## &lt;&lt;Oven&gt;&gt;

Oven Model : CTO-20AC  
 Enable Oven : Use  
 Oven Temperature : 15 C  
 Maximum Temperature : 90 C  
 Ready Check : On

## &lt;&lt;LC Time Program&gt;&gt;

| Time  | Module     | Command      | Value | Comment |
|-------|------------|--------------|-------|---------|
| 3.00  | Pumps      | Pump B Conc. | 8     |         |
| 3.25  | Pumps      | Pump B Conc. | 25    |         |
| 17.50 | Pumps      | Pump B Conc. | 25    |         |
| 18.00 | Pumps      | Pump B Conc. | 8     |         |
| 20.00 | Controller | Stop         |       |         |

## &lt;&lt;SFC A&gt;&gt;

SFC : SFC-30A  
 BPR Pressure : 100.0 bar  
 BPR Temperature : 50 C

## &lt;&lt;SFC B&gt;&gt;

SFC : SFC-30A  
 BPR Pressure : 400.0 bar  
 BPR Temperature : 50 C

## &lt;&lt;Sample Pretreatment&gt;&gt;

Mode : Standard
