# Supplementary material for: Subcritical Fluid Chromatography at Sub-Ambient Temperatures for the Chiral Resolution of Ketamine Metabolites with Rapid-Onset Antidepressant Effects
Source: MDPI journal article supplement (doi:10.3390/molecules24101927), 2019-05-19
Supplement: s1 [file s1]

Sample Information  
Data File : S-mix\_1\$10\_10min\_15°C\_100bar\_1.5ml-min\_grad3min25%\_C\_004.lcd

## Method

## &lt;&lt;Pump&gt;&gt;

Mode : Binary gradient  
Total Flow : 1.5000 mL/min  
Pump C Flow : 0.1000 mL/min  
B Conc. : 8.0 %  
B Curve : 0  
PressMax : 350 bar  
PressMin : 0 bar  
Pump C PressMax : 350 bar  
Pump C PressMin : 0 bar  
Solenoid Valve B Name : LPGE Unit  
Solenoid Valve B : C  
Compressibility Setting : Off  
Pump A Shut Off Valve : Open

## &lt;&lt;Autosampler&gt;&gt;

Autosampler Model : SIL-30AC  
Enable Autosampler : Use  
Rinse Type : External only  
Sample Rack : Rack 1.5 mL 105 vials  
Rinsing Volume : 500 uL  
Needle Stroke : 52 mm  
Control Vial Needle Stroke : 52 mm  
Rinsing Speed : 35 uL/sec  
Sampling Speed : 5.0 uL/sec  
Sample Discharge Speed : 1.0 uL/sec  
Measuring Line Purge Time : 10.0 min  
Rinse Port R0 Purge Time : 10.0 min  
Rinse Mode : Before and after aspiration  
Rinse Dip Time : 0 sec  
Cooler Temperature : 7 C  
Measuring Line Purge Volume : 100 uL  
Air Gap Volume : 0.1 uL  
Loop Injection Type : Partial Loop  
Rinse Method : Rinse port only  
Rinse Time : 2 sec

## &lt;&lt;Oven&gt;&gt;

Oven Model : CTO-20AC  
Enable Oven : Use  
Oven Temperature : 15 C  
Maximum Temperature : 90 C  
Ready Check : On

## &lt;&lt;LC Time Program&gt;&gt;

| Time  | Module     | Command      | Value | Comment |
|-------|------------|--------------|-------|---------|
| 3.00  | Pumps      | Pump B Conc. | 8     |         |
| 3.25  | Pumps      | Pump B Conc. | 25    |         |
| 8.50  | Pumps      | Pump B Conc. | 25    |         |
| 9.00  | Pumps      | Pump B Conc. | 8     |         |
| 10.00 | Controller | Stop         |       |         |

## &lt;&lt;SFC A&gt;&gt;

SFC : SFC-30A  
BPR Pressure : 100.0 bar  
BPR Temperature : 50 C

## &lt;&lt;SFC B&gt;&gt;

SFC : SFC-30A  
BPR Pressure : 400.0 bar  
BPR Temperature : 50 C

## &lt;&lt;Sample Pretreatment&gt;&gt;

Mode : Standard

Sample Information  
Data File : S-mix\_1\$10\_10min\_15°C\_100bar\_1.5ml-min\_grad3min25%\_C\_004.lcd

## Method

## &lt;&lt;Pump&gt;&gt;

Mode : Binary gradient  
Total Flow : 1.5000 mL/min  
Pump C Flow : 0.1000 mL/min  
B Conc. : 8.0 %  
B Curve : 0  
PressMax : 350 bar  
PressMin : 0 bar  
Pump C PressMax : 350 bar  
Pump C PressMin : 0 bar  
Solenoid Valve B Name : LPGE Unit  
Solenoid Valve B : C  
Compressibility Setting : Off  
Pump A Shut Off Valve : Open

## &lt;&lt;Autosampler&gt;&gt;

Autosampler Model : SIL-30AC  
Enable Autosampler : Use  
Rinse Type : External only  
Sample Rack : Rack 1.5 mL 105 vials  
Rinsing Volume : 500 uL  
Needle Stroke : 52 mm  
Control Vial Needle Stroke : 52 mm  
Rinsing Speed : 35 uL/sec  
Sampling Speed : 5.0 uL/sec  
Sample Discharge Speed : 1.0 uL/sec  
Measuring Line Purge Time : 10.0 min  
Rinse Port R0 Purge Time : 10.0 min  
Rinse Mode : Before and after aspiration  
Rinse Dip Time : 0 sec  
Cooler Temperature : 7 C  
Measuring Line Purge Volume : 100 uL  
Air Gap Volume : 0.1 uL  
Loop Injection Type : Partial Loop  
Rinse Method : Rinse port only  
Rinse Time : 2 sec

## &lt;&lt;Oven&gt;&gt;

Oven Model : CTO-20AC  
Enable Oven : Use  
Oven Temperature : 15 C  
Maximum Temperature : 90 C  
Ready Check : On

## &lt;&lt;LC Time Program&gt;&gt;

| Time  | Module     | Command      | Value | Comment |
|-------|------------|--------------|-------|---------|
| 3.00  | Pumps      | Pump B Conc. | 8     |         |
| 3.25  | Pumps      | Pump B Conc. | 25    |         |
| 8.50  | Pumps      | Pump B Conc. | 25    |         |
| 9.00  | Pumps      | Pump B Conc. | 8     |         |
| 10.00 | Controller | Stop         |       |         |

## &lt;&lt;SFC A&gt;&gt;

SFC : SFC-30A  
BPR Pressure : 100.0 bar  
BPR Temperature : 50 C

## &lt;&lt;SFC B&gt;&gt;

SFC : SFC-30A  
BPR Pressure : 400.0 bar  
BPR Temperature : 50 C

## &lt;&lt;Sample Pretreatment&gt;&gt;

Mode : Standard

Sample Information  
Data File : S-mix\_1\$10\_10min\_15°C\_100bar\_1.5ml-min\_grad3min25%\_C\_004.lcd

## Method

## &lt;&lt;Pump&gt;&gt;

Mode : Binary gradient  
Total Flow : 1.5000 mL/min  
Pump C Flow : 0.1000 mL/min  
B Conc. : 8.0 %  
B Curve : 0  
PressMax : 350 bar  
PressMin : 0 bar  
Pump C PressMax : 350 bar  
Pump C PressMin : 0 bar  
Solenoid Valve B Name : LPGE Unit  
Solenoid Valve B : C  
Compressibility Setting : Off  
Pump A Shut Off Valve : Open

## &lt;&lt;Autosampler&gt;&gt;

Autosampler Model : SIL-30AC  
Enable Autosampler : Use  
Rinse Type : External only  
Sample Rack : Rack 1.5 mL 105 vials  
Rinsing Volume : 500 uL  
Needle Stroke : 52 mm  
Control Vial Needle Stroke : 52 mm  
Rinsing Speed : 35 uL/sec  
Sampling Speed : 5.0 uL/sec  
Sample Discharge Speed : 1.0 uL/sec  
Measuring Line Purge Time : 10.0 min  
Rinse Port R0 Purge Time : 10.0 min  
Rinse Mode : Before and after aspiration  
Rinse Dip Time : 0 sec  
Cooler Temperature : 7 C  
Measuring Line Purge Volume : 100 uL  
Air Gap Volume : 0.1 uL  
Loop Injection Type : Partial Loop  
Rinse Method : Rinse port only  
Rinse Time : 2 sec

## &lt;&lt;Oven&gt;&gt;

Oven Model : CTO-20AC  
Enable Oven : Use  
Oven Temperature : 15 C  
Maximum Temperature : 90 C  
Ready Check : On

## &lt;&lt;LC Time Program&gt;&gt;

| Time  | Module     | Command      | Value | Comment |
|-------|------------|--------------|-------|---------|
| 3.00  | Pumps      | Pump B Conc. | 8     |         |
| 3.25  | Pumps      | Pump B Conc. | 25    |         |
| 8.50  | Pumps      | Pump B Conc. | 25    |         |
| 9.00  | Pumps      | Pump B Conc. | 8     |         |
| 10.00 | Controller | Stop         |       |         |

## &lt;&lt;SFC A&gt;&gt;

SFC : SFC-30A  
BPR Pressure : 100.0 bar  
BPR Temperature : 50 C

## &lt;&lt;SFC B&gt;&gt;

SFC : SFC-30A  
BPR Pressure : 400.0 bar  
BPR Temperature : 50 C

## &lt;&lt;Sample Pretreatment&gt;&gt;

Mode : Standard

Sample Information  
Data File : S-mix\_1\$10\_10min\_15°C\_100bar\_1.5ml-min\_grad3min25%\_C\_004.lcd

## Method

## &lt;&lt;Pump&gt;&gt;

Mode : Binary gradient  
Total Flow : 1.5000 mL/min  
Pump C Flow : 0.1000 mL/min  
B Conc. : 8.0 %  
B Curve : 0  
PressMax : 350 bar  
PressMin : 0 bar  
Pump C PressMax : 350 bar  
Pump C PressMin : 0 bar  
Solenoid Valve B Name : LPGE Unit  
Solenoid Valve B : C  
Compressibility Setting : Off  
Pump A Shut Off Valve : Open

## &lt;&lt;Autosampler&gt;&gt;

Autosampler Model : SIL-30AC  
Enable Autosampler : Use  
Rinse Type : External only  
Sample Rack : Rack 1.5 mL 105 vials  
Rinsing Volume : 500 uL  
Needle Stroke : 52 mm  
Control Vial Needle Stroke : 52 mm  
Rinsing Speed : 35 uL/sec  
Sampling Speed : 5.0 uL/sec  
Sample Discharge Speed : 1.0 uL/sec  
Measuring Line Purge Time : 10.0 min  
Rinse Port R0 Purge Time : 10.0 min  
Rinse Mode : Before and after aspiration  
Rinse Dip Time : 0 sec  
Cooler Temperature : 7 C  
Measuring Line Purge Volume : 100 uL  
Air Gap Volume : 0.1 uL  
Loop Injection Type : Partial Loop  
Rinse Method : Rinse port only  
Rinse Time : 2 sec

## &lt;&lt;Oven&gt;&gt;

Oven Model : CTO-20AC  
Enable Oven : Use  
Oven Temperature : 15 C  
Maximum Temperature : 90 C  
Ready Check : On

## &lt;&lt;LC Time Program&gt;&gt;

| Time  | Module     | Command      | Value | Comment |
|-------|------------|--------------|-------|---------|
| 3.00  | Pumps      | Pump B Conc. | 8     |         |
| 3.25  | Pumps      | Pump B Conc. | 25    |         |
| 8.50  | Pumps      | Pump B Conc. | 25    |         |
| 9.00  | Pumps      | Pump B Conc. | 8     |         |
| 10.00 | Controller | Stop         |       |         |

## &lt;&lt;SFC A&gt;&gt;

SFC : SFC-30A  
BPR Pressure : 100.0 bar  
BPR Temperature : 50 C

## &lt;&lt;SFC B&gt;&gt;

SFC : SFC-30A  
BPR Pressure : 400.0 bar  
BPR Temperature : 50 C

## &lt;&lt;Sample Pretreatment&gt;&gt;

Mode : Standard

Sample Information  
Data File : S-mix\_1\$10\_10min\_15°C\_100bar\_1.5ml-min\_grad3min25%\_C\_004.lcd

## Method

## &lt;&lt;Pump&gt;&gt;

Mode : Binary gradient  
Total Flow : 1.5000 mL/min  
Pump C Flow : 0.1000 mL/min  
B Conc. : 8.0 %  
B Curve : 0  
PressMax : 350 bar  
PressMin : 0 bar  
Pump C PressMax : 350 bar  
Pump C PressMin : 0 bar  
Solenoid Valve B Name : LPGE Unit  
Solenoid Valve B : C  
Compressibility Setting : Off  
Pump A Shut Off Valve : Open

## &lt;&lt;Autosampler&gt;&gt;

Autosampler Model : SIL-30AC  
Enable Autosampler : Use  
Rinse Type : External only  
Sample Rack : Rack 1.5 mL 105 vials  
Rinsing Volume : 500 uL  
Needle Stroke : 52 mm  
Control Vial Needle Stroke : 52 mm  
Rinsing Speed : 35 uL/sec  
Sampling Speed : 5.0 uL/sec  
Sample Discharge Speed : 1.0 uL/sec  
Measuring Line Purge Time : 10.0 min  
Rinse Port R0 Purge Time : 10.0 min  
Rinse Mode : Before and after aspiration  
Rinse Dip Time : 0 sec  
Cooler Temperature : 7 C  
Measuring Line Purge Volume : 100 uL  
Air Gap Volume : 0.1 uL  
Loop Injection Type : Partial Loop  
Rinse Method : Rinse port only  
Rinse Time : 2 sec

## &lt;&lt;Oven&gt;&gt;

Oven Model : CTO-20AC  
Enable Oven : Use  
Oven Temperature : 15 C  
Maximum Temperature : 90 C  
Ready Check : On

## &lt;&lt;LC Time Program&gt;&gt;

| Time  | Module     | Command      | Value | Comment |
|-------|------------|--------------|-------|---------|
| 3.00  | Pumps      | Pump B Conc. | 8     |         |
| 3.25  | Pumps      | Pump B Conc. | 25    |         |
| 8.50  | Pumps      | Pump B Conc. | 25    |         |
| 9.00  | Pumps      | Pump B Conc. | 8     |         |
| 10.00 | Controller | Stop         |       |         |

## &lt;&lt;SFC A&gt;&gt;

SFC : SFC-30A  
BPR Pressure : 100.0 bar  
BPR Temperature : 50 C

## &lt;&lt;SFC B&gt;&gt;

SFC : SFC-30A  
BPR Pressure : 400.0 bar  
BPR Temperature : 50 C

## &lt;&lt;Sample Pretreatment&gt;&gt;

Mode : Standard

Sample Information  
Data File : S-mix\_1\$10\_10min\_15°C\_100bar\_1.5ml-min\_grad3min25%\_C\_004.lcd

## Method

## &lt;&lt;Pump&gt;&gt;

Mode : Binary gradient  
Total Flow : 1.5000 mL/min  
Pump C Flow : 0.1000 mL/min  
B Conc. : 8.0 %  
B Curve : 0  
PressMax : 350 bar  
PressMin : 0 bar  
Pump C PressMax : 350 bar  
Pump C PressMin : 0 bar  
Solenoid Valve B Name : LPGE Unit  
Solenoid Valve B : C  
Compressibility Setting : Off  
Pump A Shut Off Valve : Open

## &lt;&lt;Autosampler&gt;&gt;

Autosampler Model : SIL-30AC  
Enable Autosampler : Use  
Rinse Type : External only  
Sample Rack : Rack 1.5 mL 105 vials  
Rinsing Volume : 500 uL  
Needle Stroke : 52 mm  
Control Vial Needle Stroke : 52 mm  
Rinsing Speed : 35 uL/sec  
Sampling Speed : 5.0 uL/sec  
Sample Discharge Speed : 1.0 uL/sec  
Measuring Line Purge Time : 10.0 min  
Rinse Port R0 Purge Time : 10.0 min  
Rinse Mode : Before and after aspiration  
Rinse Dip Time : 0 sec  
Cooler Temperature : 7 C  
Measuring Line Purge Volume : 100 uL  
Air Gap Volume : 0.1 uL  
Loop Injection Type : Partial Loop  
Rinse Method : Rinse port only  
Rinse Time : 2 sec

## &lt;&lt;Oven&gt;&gt;

Oven Model : CTO-20AC  
Enable Oven : Use  
Oven Temperature : 15 C  
Maximum Temperature : 90 C  
Ready Check : On

## &lt;&lt;LC Time Program&gt;&gt;

| Time  | Module     | Command      | Value | Comment |
|-------|------------|--------------|-------|---------|
| 3.00  | Pumps      | Pump B Conc. | 8     |         |
| 3.25  | Pumps      | Pump B Conc. | 25    |         |
| 8.50  | Pumps      | Pump B Conc. | 25    |         |
| 9.00  | Pumps      | Pump B Conc. | 8     |         |
| 10.00 | Controller | Stop         |       |         |

## &lt;&lt;SFC A&gt;&gt;

SFC : SFC-30A  
BPR Pressure : 100.0 bar  
BPR Temperature : 50 C

## &lt;&lt;SFC B&gt;&gt;

SFC : SFC-30A  
BPR Pressure : 400.0 bar  
BPR Temperature : 50 C

## &lt;&lt;Sample Pretreatment&gt;&gt;

Mode : Standard
