# Supplementary material for: Subcritical Fluid Chromatography at Sub-Ambient Temperatures for the Chiral Resolution of Ketamine Metabolites with Rapid-Onset Antidepressant Effects
Source: MDPI journal article supplement (doi:10.3390/molecules24101927), 2019-05-19
Supplement: s1 [file s1]

Sample Information  
Data File : MM10µL\_100\$200bar\_0%\_8%\_25%\_001.lcd

## Method

## &lt;&lt;Pump&gt;&gt;

Mode : Binary gradient  
Total Flow : 1.5000 mL/min  
Pump C Flow : 0.1000 mL/min  
B Conc. : 0.0 %  
B Curve : 0  
PressMax : 350 bar  
PressMin : 0 bar  
Pump C PressMax : 350 bar  
Pump C PressMin : 0 bar  
Solenoid Valve B Name : LPGE Unit  
Solenoid Valve B : C  
Compressibility Setting : Off

## &lt;&lt;Autosampler&gt;&gt;

Autosampler Model : SFE-30A  
Heating Individually : Off  
Vessel 1 Temperature : 35 C  
Vessel 2 Temperature : 35 C  
Vessel 3 Temperature : 35 C  
Vessel 4 Temperature : 35 C  
Temperature Limit : 93 C  
Rinsing Needle After Extracting : 2 sec

## &lt;&lt;Oven&gt;&gt;

Oven Model : CTO-20AC  
Enable Oven : Use  
Oven Temperature : 15 C  
Maximum Temperature : 90 C  
Ready Check : On

## &lt;&lt;LC Time Program&gt;&gt;

| Time  | Module                     | Command                | Value         | Comment |
|-------|----------------------------|------------------------|---------------|---------|
| 3.00  | SFE                        | Extraction Valve       | Dynamic       |         |
| 3.49  | Supercritical Controller B |                        | BPR Press.    | 400.0   |
| 3.49  | Supercritical Controller A |                        | BPR Press.    | 100.0   |
| 3.50  | SFE                        | End                    |               |         |
| 3.51  | Pumps                      | Pump B Conc.           | 0             |         |
| 3.52  | Pumps                      | Pump B Conc.           | 8             |         |
| 6.50  | Pumps                      | Pump B Conc.           | 8             |         |
| 6.75  | Pumps                      | Pump B Conc.           | 25            |         |
| 12.50 | Pumps                      | Pump B Conc.           | 25            |         |
| 12.50 | SFE                        | Wash                   |               |         |
| 12.51 | Pumps                      | Pump B Conc.           | 100           |         |
| 12.51 | Pumps                      | Shut Off Valve(Pump A) | Close         |         |
| 12.52 | Pumps                      | Total Flow             | 1.5           |         |
| 12.53 | Pumps                      | Total Flow             | 0.4           |         |
| 14.53 | Pumps                      | Shut Off Valve(Pump A) | Open          |         |
| 14.53 | Pumps                      | Total Flow             | 0.4           |         |
| 14.54 | Pumps                      | Total Flow             | 0             |         |
| 15.03 | Pumps                      | Shut Off Valve(Pump A) | Open(Pump On) |         |
| 15.04 | SFE                        | Extraction Valve       | Static        |         |
| 15.04 | Pumps                      | Total Flow             | 0             |         |
| 15.05 | Pumps                      | Total Flow             | 1.5           |         |
| 15.06 | Pumps                      | Pump B Conc.           | 100           |         |
| 15.07 | Pumps                      | Pump B Conc.           | 3             |         |
| 16.57 | Controller                 | Stop                   |               |         |

## &lt;&lt;SFC A&gt;&gt;

SFC : SFC-30A  
BPR Pressure : 100.0 bar  
BPR Temperature : 50 C

## &lt;&lt;SFC B&gt;&gt;

SFC : SFC-30A  
BPR Pressure : 200.0 bar  
BPR Temperature : 50 C

Data File : MM10µL\_100\$200bar\_0%\_8%\_25%\_001.lcd

## Sample Information

## Method

## &lt;&lt;Pump&gt;&gt;

Mode : Binary gradient  
 Total Flow : 1.5000 mL/min  
 Pump C Flow : 0.1000 mL/min  
 B Conc. : 0.0 %  
 B Curve : 0  
 PressMax : 350 bar  
 PressMin : 0 bar  
 Pump C PressMax : 350 bar  
 Pump C PressMin : 0 bar  
 Solenoid Valve B Name : LPGE Unit  
 Solenoid Valve B : C  
 Compressibility Setting : Off

## &lt;&lt;Autosampler&gt;&gt;

Autosampler Model : SFE-30A  
 Heating Individually : Off  
 Vessel 1 Temperature : 35 C  
 Vessel 2 Temperature : 35 C  
 Vessel 3 Temperature : 35 C  
 Vessel 4 Temperature : 35 C  
 Temperature Limit : 93 C  
 Rinsing Needle After Extracting : 2 sec

## &lt;&lt;Oven&gt;&gt;

Oven Model : CTO-20AC  
 Enable Oven : Use  
 Oven Temperature : 15 C  
 Maximum Temperature : 90 C  
 Ready Check : On

## &lt;&lt;LC Time Program&gt;&gt;

| Time  | Module                     | Command                | Value         | Comment |
|-------|----------------------------|------------------------|---------------|---------|
| 3.00  | SFE                        | Extraction Valve       | Dynamic       |         |
| 3.49  | Supercritical Controller B |                        | BPR Press.    | 400.0   |
| 3.49  | Supercritical Controller A |                        | BPR Press.    | 100.0   |
| 3.50  | SFE                        | End                    |               |         |
| 3.51  | Pumps                      | Pump B Conc.           | 0             |         |
| 3.52  | Pumps                      | Pump B Conc.           | 8             |         |
| 6.50  | Pumps                      | Pump B Conc.           | 8             |         |
| 6.75  | Pumps                      | Pump B Conc.           | 25            |         |
| 12.50 | Pumps                      | Pump B Conc.           | 25            |         |
| 12.50 | SFE                        | Wash                   |               |         |
| 12.51 | Pumps                      | Pump B Conc.           | 100           |         |
| 12.51 | Pumps                      | Shut Off Valve(Pump A) | Close         |         |
| 12.52 | Pumps                      | Total Flow             | 1.5           |         |
| 12.53 | Pumps                      | Total Flow             | 0.4           |         |
| 14.53 | Pumps                      | Shut Off Valve(Pump A) | Open          |         |
| 14.53 | Pumps                      | Total Flow             | 0.4           |         |
| 14.54 | Pumps                      | Total Flow             | 0             |         |
| 15.03 | Pumps                      | Shut Off Valve(Pump A) | Open(Pump On) |         |
| 15.04 | SFE                        | Extraction Valve       | Static        |         |
| 15.04 | Pumps                      | Total Flow             | 0             |         |
| 15.05 | Pumps                      | Total Flow             | 1.5           |         |
| 15.06 | Pumps                      | Pump B Conc.           | 100           |         |
| 15.07 | Pumps                      | Pump B Conc.           | 3             |         |
| 16.57 | Controller                 | Stop                   |               |         |

## &lt;&lt;SFC A&gt;&gt;

SFC : SFC-30A  
 BPR Pressure : 100.0 bar  
 BPR Temperature : 50 C

## &lt;&lt;SFC B&gt;&gt;

SFC : SFC-30A  
 BPR Pressure : 200.0 bar  
 BPR Temperature : 50 C

Sample Information  
Data File : MM10µL\_100\$200bar\_0%\_8%\_25%\_001.lcd

## Method

## &lt;&lt;Pump&gt;&gt;

Mode : Binary gradient  
Total Flow : 1.5000 mL/min  
Pump C Flow : 0.1000 mL/min  
B Conc. : 0.0 %  
B Curve : 0  
PressMax : 350 bar  
PressMin : 0 bar  
Pump C PressMax : 350 bar  
Pump C PressMin : 0 bar  
Solenoid Valve B Name : LPGE Unit  
Solenoid Valve B : C  
Compressibility Setting : Off

## &lt;&lt;Autosampler&gt;&gt;

Autosampler Model : SFE-30A  
Heating Individually : Off  
Vessel 1 Temperature : 35 C  
Vessel 2 Temperature : 35 C  
Vessel 3 Temperature : 35 C  
Vessel 4 Temperature : 35 C  
Temperature Limit : 93 C  
Rinsing Needle After Extracting : 2 sec

## &lt;&lt;Oven&gt;&gt;

Oven Model : CTO-20AC  
Enable Oven : Use  
Oven Temperature : 15 C  
Maximum Temperature : 90 C  
Ready Check : On

## &lt;&lt;LC Time Program&gt;&gt;

| Time  | Module                     | Command                              | Value   | Comment |
|-------|----------------------------|--------------------------------------|---------|---------|
| 3.00  | SFE                        | Extraction Valve                     | Dynamic |         |
| 3.49  | Supercritical Controller B | BPR Press.                           | 400.0   |         |
| 3.49  | Supercritical Controller A | BPR Press.                           | 100.0   |         |
| 3.50  | SFE                        | End                                  |         |         |
| 3.51  | Pumps                      | Pump B Conc.                         | 0       |         |
| 3.52  | Pumps                      | Pump B Conc.                         | 8       |         |
| 6.50  | Pumps                      | Pump B Conc.                         | 8       |         |
| 6.75  | Pumps                      | Pump B Conc.                         | 25      |         |
| 12.50 | Pumps                      | Pump B Conc.                         | 25      |         |
| 12.50 | SFE                        | Wash                                 |         |         |
| 12.51 | Pumps                      | Pump B Conc.                         | 100     |         |
| 12.51 | Pumps                      | Shut Off Valve(Pump A) Close         |         |         |
| 12.52 | Pumps                      | Total Flow                           | 1.5     |         |
| 12.53 | Pumps                      | Total Flow                           | 0.4     |         |
| 14.53 | Pumps                      | Shut Off Valve(Pump A) Open          |         |         |
| 14.53 | Pumps                      | Total Flow                           | 0.4     |         |
| 14.54 | Pumps                      | Total Flow                           | 0       |         |
| 15.03 | Pumps                      | Shut Off Valve(Pump A) Open(Pump On) |         |         |
| 15.04 | SFE                        | Extraction Valve                     | Static  |         |
| 15.04 | Pumps                      | Total Flow                           | 0       |         |
| 15.05 | Pumps                      | Total Flow                           | 1.5     |         |
| 15.06 | Pumps                      | Pump B Conc.                         | 100     |         |
| 15.07 | Pumps                      | Pump B Conc.                         | 3       |         |
| 16.57 | Controller                 | Stop                                 |         |         |

## &lt;&lt;SFC A&gt;&gt;

SFC : SFC-30A  
BPR Pressure : 100.0 bar  
BPR Temperature : 50 C

## &lt;&lt;SFC B&gt;&gt;

SFC : SFC-30A  
BPR Pressure : 200.0 bar  
BPR Temperature : 50 C

Sample Information  
Data File : MM10µL\_100\$200bar\_0%\_8%\_25%\_001.lcd

## Method

## &lt;&lt;Pump&gt;&gt;

Mode : Binary gradient  
Total Flow : 1.5000 mL/min  
Pump C Flow : 0.1000 mL/min  
B Conc. : 0.0 %  
B Curve : 0  
PressMax : 350 bar  
PressMin : 0 bar  
Pump C PressMax : 350 bar  
Pump C PressMin : 0 bar  
Solenoid Valve B Name : LPGE Unit  
Solenoid Valve B : C  
Compressibility Setting : Off

## &lt;&lt;Autosampler&gt;&gt;

Autosampler Model : SFE-30A  
Heating Individually : Off  
Vessel 1 Temperature : 35 C  
Vessel 2 Temperature : 35 C  
Vessel 3 Temperature : 35 C  
Vessel 4 Temperature : 35 C  
Temperature Limit : 93 C  
Rinsing Needle After Extracting : 2 sec

## &lt;&lt;Oven&gt;&gt;

Oven Model : CTO-20AC  
Enable Oven : Use  
Oven Temperature : 15 C  
Maximum Temperature : 90 C  
Ready Check : On

## &lt;&lt;LC Time Program&gt;&gt;

| Time  | Module                     | Command                | Value         | Comment |
|-------|----------------------------|------------------------|---------------|---------|
| 3.00  | SFE                        | Extraction Valve       | Dynamic       |         |
| 3.49  | Supercritical Controller B |                        | BPR Press.    | 400.0   |
| 3.49  | Supercritical Controller A |                        | BPR Press.    | 100.0   |
| 3.50  | SFE                        | End                    |               |         |
| 3.51  | Pumps                      | Pump B Conc.           | 0             |         |
| 3.52  | Pumps                      | Pump B Conc.           | 8             |         |
| 6.50  | Pumps                      | Pump B Conc.           | 8             |         |
| 6.75  | Pumps                      | Pump B Conc.           | 25            |         |
| 12.50 | Pumps                      | Pump B Conc.           | 25            |         |
| 12.50 | SFE                        | Wash                   |               |         |
| 12.51 | Pumps                      | Pump B Conc.           | 100           |         |
| 12.51 | Pumps                      | Shut Off Valve(Pump A) | Close         |         |
| 12.52 | Pumps                      | Total Flow             | 1.5           |         |
| 12.53 | Pumps                      | Total Flow             | 0.4           |         |
| 14.53 | Pumps                      | Shut Off Valve(Pump A) | Open          |         |
| 14.53 | Pumps                      | Total Flow             | 0.4           |         |
| 14.54 | Pumps                      | Total Flow             | 0             |         |
| 15.03 | Pumps                      | Shut Off Valve(Pump A) | Open(Pump On) |         |
| 15.04 | SFE                        | Extraction Valve       | Static        |         |
| 15.04 | Pumps                      | Total Flow             | 0             |         |
| 15.05 | Pumps                      | Total Flow             | 1.5           |         |
| 15.06 | Pumps                      | Pump B Conc.           | 100           |         |
| 15.07 | Pumps                      | Pump B Conc.           | 3             |         |
| 16.57 | Controller                 | Stop                   |               |         |

## &lt;&lt;SFC A&gt;&gt;

SFC : SFC-30A  
BPR Pressure : 100.0 bar  
BPR Temperature : 50 C

## &lt;&lt;SFC B&gt;&gt;

SFC : SFC-30A  
BPR Pressure : 200.0 bar  
BPR Temperature : 50 C

Sample Information  
Data File : MM10µL\_100\$200bar\_0%\_8%\_25%\_001.lcd

## Method

## &lt;&lt;Pump&gt;&gt;

Mode : Binary gradient  
Total Flow : 1.5000 mL/min  
Pump C Flow : 0.1000 mL/min  
B Conc. : 0.0 %  
B Curve : 0  
PressMax : 350 bar  
PressMin : 0 bar  
Pump C PressMax : 350 bar  
Pump C PressMin : 0 bar  
Solenoid Valve B Name : LPGE Unit  
Solenoid Valve B : C  
Compressibility Setting : Off

## &lt;&lt;Autosampler&gt;&gt;

Autosampler Model : SFE-30A  
Heating Individually : Off  
Vessel 1 Temperature : 35 C  
Vessel 2 Temperature : 35 C  
Vessel 3 Temperature : 35 C  
Vessel 4 Temperature : 35 C  
Temperature Limit : 93 C  
Rinsing Needle After Extracting : 2 sec

## &lt;&lt;Oven&gt;&gt;

Oven Model : CTO-20AC  
Enable Oven : Use  
Oven Temperature : 15 C  
Maximum Temperature : 90 C  
Ready Check : On

## &lt;&lt;LC Time Program&gt;&gt;

| Time  | Module                     | Command                | Value         | Comment |
|-------|----------------------------|------------------------|---------------|---------|
| 3.00  | SFE                        | Extraction Valve       | Dynamic       |         |
| 3.49  | Supercritical Controller B |                        | BPR Press.    | 400.0   |
| 3.49  | Supercritical Controller A |                        | BPR Press.    | 100.0   |
| 3.50  | SFE                        | End                    |               |         |
| 3.51  | Pumps                      | Pump B Conc.           | 0             |         |
| 3.52  | Pumps                      | Pump B Conc.           | 8             |         |
| 6.50  | Pumps                      | Pump B Conc.           | 8             |         |
| 6.75  | Pumps                      | Pump B Conc.           | 25            |         |
| 12.50 | Pumps                      | Pump B Conc.           | 25            |         |
| 12.50 | SFE                        | Wash                   |               |         |
| 12.51 | Pumps                      | Pump B Conc.           | 100           |         |
| 12.51 | Pumps                      | Shut Off Valve(Pump A) | Close         |         |
| 12.52 | Pumps                      | Total Flow             | 1.5           |         |
| 12.53 | Pumps                      | Total Flow             | 0.4           |         |
| 14.53 | Pumps                      | Shut Off Valve(Pump A) | Open          |         |
| 14.53 | Pumps                      | Total Flow             | 0.4           |         |
| 14.54 | Pumps                      | Total Flow             | 0             |         |
| 15.03 | Pumps                      | Shut Off Valve(Pump A) | Open(Pump On) |         |
| 15.04 | SFE                        | Extraction Valve       | Static        |         |
| 15.04 | Pumps                      | Total Flow             | 0             |         |
| 15.05 | Pumps                      | Total Flow             | 1.5           |         |
| 15.06 | Pumps                      | Pump B Conc.           | 100           |         |
| 15.07 | Pumps                      | Pump B Conc.           | 3             |         |
| 16.57 | Controller                 | Stop                   |               |         |

## &lt;&lt;SFC A&gt;&gt;

SFC : SFC-30A  
BPR Pressure : 100.0 bar  
BPR Temperature : 50 C

## &lt;&lt;SFC B&gt;&gt;

SFC : SFC-30A  
BPR Pressure : 200.0 bar  
BPR Temperature : 50 C

Data File : MM10µL\_100\$200bar\_0%\_8%\_25%\_001.lcd

## Sample Information

## Method

## &lt;&lt;Pump&gt;&gt;

Mode : Binary gradient  
 Total Flow : 1.5000 mL/min  
 Pump C Flow : 0.1000 mL/min  
 B Conc. : 0.0 %  
 B Curve : 0  
 PressMax : 350 bar  
 PressMin : 0 bar  
 Pump C PressMax : 350 bar  
 Pump C PressMin : 0 bar  
 Solenoid Valve B Name : LPGE Unit  
 Solenoid Valve B : C  
 Compressibility Setting : Off

## &lt;&lt;Autosampler&gt;&gt;

Autosampler Model : SFE-30A  
 Heating Individually : Off  
 Vessel 1 Temperature : 35 C  
 Vessel 2 Temperature : 35 C  
 Vessel 3 Temperature : 35 C  
 Vessel 4 Temperature : 35 C  
 Temperature Limit : 93 C  
 Rinsing Needle After Extracting : 2 sec

## &lt;&lt;Oven&gt;&gt;

Oven Model : CTO-20AC  
 Enable Oven : Use  
 Oven Temperature : 15 C  
 Maximum Temperature : 90 C  
 Ready Check : On

## &lt;&lt;LC Time Program&gt;&gt;

| Time  | Module                     | Command                | Value         | Comment |
|-------|----------------------------|------------------------|---------------|---------|
| 3.00  | SFE                        | Extraction Valve       | Dynamic       |         |
| 3.49  | Supercritical Controller B |                        | BPR Press.    | 400.0   |
| 3.49  | Supercritical Controller A |                        | BPR Press.    | 100.0   |
| 3.50  | SFE                        | End                    |               |         |
| 3.51  | Pumps                      | Pump B Conc.           | 0             |         |
| 3.52  | Pumps                      | Pump B Conc.           | 8             |         |
| 6.50  | Pumps                      | Pump B Conc.           | 8             |         |
| 6.75  | Pumps                      | Pump B Conc.           | 25            |         |
| 12.50 | Pumps                      | Pump B Conc.           | 25            |         |
| 12.50 | SFE                        | Wash                   |               |         |
| 12.51 | Pumps                      | Pump B Conc.           | 100           |         |
| 12.51 | Pumps                      | Shut Off Valve(Pump A) | Close         |         |
| 12.52 | Pumps                      | Total Flow             | 1.5           |         |
| 12.53 | Pumps                      | Total Flow             | 0.4           |         |
| 14.53 | Pumps                      | Shut Off Valve(Pump A) | Open          |         |
| 14.53 | Pumps                      | Total Flow             | 0.4           |         |
| 14.54 | Pumps                      | Total Flow             | 0             |         |
| 15.03 | Pumps                      | Shut Off Valve(Pump A) | Open(Pump On) |         |
| 15.04 | SFE                        | Extraction Valve       | Static        |         |
| 15.04 | Pumps                      | Total Flow             | 0             |         |
| 15.05 | Pumps                      | Total Flow             | 1.5           |         |
| 15.06 | Pumps                      | Pump B Conc.           | 100           |         |
| 15.07 | Pumps                      | Pump B Conc.           | 3             |         |
| 16.57 | Controller                 | Stop                   |               |         |

## &lt;&lt;SFC A&gt;&gt;

SFC : SFC-30A  
 BPR Pressure : 100.0 bar  
 BPR Temperature : 50 C

## &lt;&lt;SFC B&gt;&gt;

SFC : SFC-30A  
 BPR Pressure : 200.0 bar  
 BPR Temperature : 50 C
